# Supplementary material for: Phenotypic clustering: a novel method for microglial morphology analysis
Source: Springer Nature journal article supplement (doi:10.1186/s12974-016-0614-7), 2016-06-17
Supplement: MOESM4 [file 10272194]

Additional file 4. **Descriptive statistics for microglia cells by condition**

| Criteria                                               | Controls (n=7)   |                  |                  |                  | LPS (n=6)        |                  |                  |                  |
|--------------------------------------------------------|------------------|------------------|------------------|------------------|------------------|------------------|------------------|------------------|
|                                                        | H                | FC               | S                | C                | H                | FC               | S                | C                |
| <b>GFP Intensity</b>                                   | 9985<br>(1097)   | 11307<br>(1815)  | 9877<br>(1289)   | 10419<br>(1292)  | 11360<br>(2737)  | 12109<br>(1524)  | 10508<br>(1797)  | 11869<br>(2709)  |
| <b>Cell Body Area<br/>(<math>\mu\text{m}^2</math>)</b> | 22.72<br>(2.24)  | 21.93<br>(1.98)  | 22.87<br>(2.1)   | 20.45<br>(0.84)  | 26.47<br>(1.33)  | 25.34<br>(1.35)  | 26.47<br>(1.04)  | 24.69<br>(1.98)  |
| <b>Cytoplasm Area<br/>(<math>\mu\text{m}^2</math>)</b> | 74.42<br>(8.80)  | 63.39<br>(9.79)  | 66.28<br>(4.09)  | 123.4<br>(24.37) | 149.4<br>(23.23) | 123.0<br>(11.39) | 129.2<br>(14.44) | 177.0<br>(29.81) |
| <b>Complexity Index</b>                                | 5.89<br>(1.45)   | 5.68<br>(1.58)   | 7.98<br>(1.80)   | 4.49<br>(0.22)   | 4.98<br>(0.51)   | 6.09<br>(0.81)   | 7.30<br>(1.35)   | 3.59<br>(0.23)   |
| <b>CEA (<math>\mu\text{m}^2</math>)</b>                | 953.4<br>(330.7) | 950.6<br>(400.9) | 1378<br>(489)    | 450<br>(109.7)   | 907.6<br>(146.2) | 1184<br>(253.5)  | 1499<br>(396)    | 360.1<br>(145.9) |
| <b>Density (Cells/<math>\text{mm}^2</math>)</b>        | 240.7<br>(53.38) | 370.8<br>(101.3) | 250.2<br>(55.59) | 99.12<br>(23.61) | 174.0<br>(56.44) | 373.8<br>(58.42) | 256.5<br>(55.84) | 62.76<br>(46.31) |

Values are expressed as mean ( $\pm$  standard deviation of the mean)
