# Supplementary material for: Phenotypic clustering: a novel method for microglial morphology analysis
Source: Springer Nature journal article supplement (doi:10.1186/s12974-016-0614-7), 2016-06-17
Supplement: MOESM6 [file 10272194]

Additional file 6. **Descriptive statistics for amoeboid cells by condition**

| Criteria                                               | Controls (n=7)   |                  |                 |                  | LPS (n=6)        |                  |                  |                  |
|--------------------------------------------------------|------------------|------------------|-----------------|------------------|------------------|------------------|------------------|------------------|
|                                                        | H                | FC               | S               | C                | H                | FC               | S                | C                |
| <b>GFP Intensity</b>                                   | 9062<br>(700.8)  | 10334<br>(1382)  | 9075<br>(991)   | 10120<br>(924.5) | 9666<br>(1814)   | 10332<br>(1352)  | 9400<br>(1565)   | 10744<br>(2133)  |
| <b>Cell Body Area<br/>(<math>\mu\text{m}^2</math>)</b> | 19.54<br>(1.37)  | 19.96<br>(1.53)  | 22.05<br>(1.46) | 18.83<br>(1.42)  | 23.94<br>(2.17)  | 21.56<br>(1.57)  | 22.72<br>(3.73)  | 22.96<br>(2.18)  |
| <b>Cytoplasm Area<br/>(<math>\mu\text{m}^2</math>)</b> | 58.29<br>(16.16) | 56.32<br>(19.00) | 55.74<br>(7.66) | 130.5<br>(99.65) | 102.8<br>(53.35) | 91.43<br>(22.09) | 102.2<br>(34.74) | 230.4<br>(203.8) |
| <b>Density (Cells/<math>\text{mm}^2</math>)</b>        | 19.12<br>(4.34)  | 18.80<br>(7.26)  | 11.12<br>(2.42) | 16.65<br>(3.58)  | 13.95<br>(5.78)  | 11.34<br>(4.47)  | 8.46<br>(3.90)   | 11.60<br>(8.20)  |
| <b>Frequency (%)</b>                                   | 7.6<br>(2.24)    | 5.64<br>(2.90)   | 4.41<br>(1.32)  | 14.73<br>(3.11)  | 7.53<br>(2.46)   | 3.13<br>(1.27)   | 3.35<br>(1.90)   | 17.30<br>(5.53)  |

Values are expressed as mean ( $\pm$  standard deviation of the mean)
